# Supplementary material for: Cholera outbreak in Forcibly Displaced Myanmar National (FDMN) from a small population segment in Cox’s Bazar, Bangladesh, 2019
Source: PubMed Central journal article supplement (PMC8457470; doi:10.1371/journal.pntd.0009618), 2021-09-22
Supplement: pntd.0009618.s004.pdf [file pntd.0009618.s004.pdf]

# PLOS Neglected Tropical Diseases

## Cholera outbreak in Forcibly Displaced Myanmar National (FDMN) from a small population segment in Cox's Bazar, Bangladesh, 2019

--Manuscript Draft--

|                                                                                                                                                                                                                                                                                                                                                                                                                                                                                                      |                                                                                                                                                                                                                                                                                                                                                                                                                                                                                                                                                                                                                                                                                                                                                                                                                                                                                                                                                                                                                                                                                                                                                                                                                                                                                                                                                                                                                                                                                                                                                                                                                                                                                                                                     |
|------------------------------------------------------------------------------------------------------------------------------------------------------------------------------------------------------------------------------------------------------------------------------------------------------------------------------------------------------------------------------------------------------------------------------------------------------------------------------------------------------|-------------------------------------------------------------------------------------------------------------------------------------------------------------------------------------------------------------------------------------------------------------------------------------------------------------------------------------------------------------------------------------------------------------------------------------------------------------------------------------------------------------------------------------------------------------------------------------------------------------------------------------------------------------------------------------------------------------------------------------------------------------------------------------------------------------------------------------------------------------------------------------------------------------------------------------------------------------------------------------------------------------------------------------------------------------------------------------------------------------------------------------------------------------------------------------------------------------------------------------------------------------------------------------------------------------------------------------------------------------------------------------------------------------------------------------------------------------------------------------------------------------------------------------------------------------------------------------------------------------------------------------------------------------------------------------------------------------------------------------|
| <b>Manuscript Number:</b>                                                                                                                                                                                                                                                                                                                                                                                                                                                                            | PNTD-D-21-00136                                                                                                                                                                                                                                                                                                                                                                                                                                                                                                                                                                                                                                                                                                                                                                                                                                                                                                                                                                                                                                                                                                                                                                                                                                                                                                                                                                                                                                                                                                                                                                                                                                                                                                                     |
| <b>Full Title:</b>                                                                                                                                                                                                                                                                                                                                                                                                                                                                                   | Cholera outbreak in Forcibly Displaced Myanmar National (FDMN) from a small population segment in Cox's Bazar, Bangladesh, 2019                                                                                                                                                                                                                                                                                                                                                                                                                                                                                                                                                                                                                                                                                                                                                                                                                                                                                                                                                                                                                                                                                                                                                                                                                                                                                                                                                                                                                                                                                                                                                                                                     |
| <b>Short Title:</b>                                                                                                                                                                                                                                                                                                                                                                                                                                                                                  | A small Cholera outbreak in Forcibly Displaced Myanmar National                                                                                                                                                                                                                                                                                                                                                                                                                                                                                                                                                                                                                                                                                                                                                                                                                                                                                                                                                                                                                                                                                                                                                                                                                                                                                                                                                                                                                                                                                                                                                                                                                                                                     |
| <b>Article Type:</b>                                                                                                                                                                                                                                                                                                                                                                                                                                                                                 | Research Article                                                                                                                                                                                                                                                                                                                                                                                                                                                                                                                                                                                                                                                                                                                                                                                                                                                                                                                                                                                                                                                                                                                                                                                                                                                                                                                                                                                                                                                                                                                                                                                                                                                                                                                    |
| <b>Keywords:</b>                                                                                                                                                                                                                                                                                                                                                                                                                                                                                     | Cholera, under-five children, displaced population, emergency and crisis settings, case management                                                                                                                                                                                                                                                                                                                                                                                                                                                                                                                                                                                                                                                                                                                                                                                                                                                                                                                                                                                                                                                                                                                                                                                                                                                                                                                                                                                                                                                                                                                                                                                                                                  |
| <b>Abstract:</b>                                                                                                                                                                                                                                                                                                                                                                                                                                                                                     | <p><b>Objective:</b> Bangladesh experienced a sudden, large influx of forcibly displaced persons from Myanmar in August 2017. A cholera outbreak occurred in the displaced population during September-December 2019. This study aimed to describe the characteristics of cholera cases, their care-seeking pattern, camp-wide distribution of Forcibly Displaced Myanmar National (FDMN) cases, sources of drinking water, toilet use pattern, oral cholera vaccine (OCV) status, and share the experiences from effective interventions to prevent a cholera outbreak.</p> <p><b>Methods :</b> Diarrhea Treatment Center (DTC) based surveillance was carried out among the FDMN in Teknaf and Leda DTCs for cholera during September-December 2019.</p> <p><b>Results:</b> During the study period, 147 cases of cholera were hospitalized. The majority, 72% of cases reported to Leda DTC. Nearly 65% sought care from FDMN settlements. About 47% of the cholera cases were children less than 5 years old and 42% were aged 15 years and more. Half of the cholera cases were females. FDMN often reported from Camp # 26 (45%), followed by Camp # 24 (36%), and Camp # 27 (12%). Eighty-two percent of the cases reported watery diarrhea. Some or severe dehydration was observed in 65% of cholera cases. Eighty-one percent of cases received pre-packaged ORS at home. About 88% of FDMN cholera cases reported consumption of public tap water. Pit latrine without water seal was often used by FDMN cholera cases (78%).</p> <p><b>Conclusion:</b> Vigilance for cholera cases by routine surveillance, preparedness, and response readiness for surges and OCV campaigns can alleviate the threats of cholera.</p> |
| <b>Additional Information:</b>                                                                                                                                                                                                                                                                                                                                                                                                                                                                       |                                                                                                                                                                                                                                                                                                                                                                                                                                                                                                                                                                                                                                                                                                                                                                                                                                                                                                                                                                                                                                                                                                                                                                                                                                                                                                                                                                                                                                                                                                                                                                                                                                                                                                                                     |
| <b>Question</b>                                                                                                                                                                                                                                                                                                                                                                                                                                                                                      | <b>Response</b>                                                                                                                                                                                                                                                                                                                                                                                                                                                                                                                                                                                                                                                                                                                                                                                                                                                                                                                                                                                                                                                                                                                                                                                                                                                                                                                                                                                                                                                                                                                                                                                                                                                                                                                     |
| <p><b>Financial Disclosure</b></p> <p>Enter a financial disclosure statement that describes the sources of funding for the work included in this submission. Review the <a href="#">submission guidelines</a> for detailed requirements. View published research articles from <a href="#">PLOS NTDs</a> for specific examples.</p> <p>This statement is required for submission and <b>will appear in the published article</b> if the submission is accepted. Please make sure it is accurate.</p> | <p>Dr. ASG Faruque<br/>Name Grant Number:GR-01875<br/>UNICEF Bangladesh</p> <p>The funders had no role in study design, data collection and analysis, decision to publish, or preparation of the manuscript.</p>                                                                                                                                                                                                                                                                                                                                                                                                                                                                                                                                                                                                                                                                                                                                                                                                                                                                                                                                                                                                                                                                                                                                                                                                                                                                                                                                                                                                                                                                                                                    |

### Unfunded studies

Enter: *The author(s) received no specific funding for this work.*

### Funded studies

Enter a statement with the following details:

- Initials of the authors who received each award
- Grant numbers awarded to each author
- The full name of each funder
- URL of each funder website
- Did the sponsors or funders play any role in the study design, data collection and analysis, decision to publish, or preparation of the manuscript?
- **NO** - Include this sentence at the end of your statement: *The funders had no role in study design, data collection and analysis, decision to publish, or preparation of the manuscript.*
- **YES** - Specify the role(s) played.

\* typeset

### Competing Interests

Use the instructions below to enter a competing interest statement for this submission. On behalf of all authors, disclose any [competing interests](#) that could be perceived to bias this work—acknowledging all financial support and any other relevant financial or non-financial competing interests.

This statement **will appear in the published article** if the submission is accepted. Please make sure it is accurate. View published research articles from [PLOS NTDs](#) for specific examples.

The authors have declared that no competing interests exist.

**NO authors have competing interests**

Enter: *The authors have declared that no competing interests exist.*

**Authors with competing interests**

Enter competing interest details beginning with this statement:

*I have read the journal's policy and the authors of this manuscript have the following competing interests: [insert competing interests here]*

\* typeset

This statement is **required** for submission and **will appear in the published article** if the submission is accepted. Please make sure it is accurate and that any funding sources listed in your Funding Information later in the submission form are also declared in your Financial Disclosure statement.

**Data Availability**

Authors are required to make all data underlying the findings described fully available, without restriction, and from the time of publication. PLOS allows rare exceptions to address legal and ethical concerns. See the [PLOS Data Policy](#) and [FAQ](#) for detailed information.

No - some restrictions will apply

A Data Availability Statement describing where the data can be found is required at submission. Your answers to this question constitute the Data Availability Statement and **will be published in the article**, if accepted.

**Important:** Stating 'data available on request from the author' is not sufficient. If your data are only available upon request, select 'No' for the first question and explain your exceptional situation in the text box.

Do the authors confirm that all data underlying the findings described in their manuscript are fully available without restriction?

**Describe where the data may be found in full sentences. If you are copying our sample text, replace any instances of XXX with the appropriate details.**

- If the data are **held or will be held in a public repository**, include URLs, accession numbers or DOIs. If this information will only be available after acceptance, indicate this by ticking the box below. For example: *All XXX files are available from the XXX database (accession number(s) XXX, XXX).*
- If the data are all contained **within the manuscript and/or Supporting Information files**, enter the following: *All relevant data are within the manuscript and its Supporting Information files.*
- If neither of these applies but you are able to provide **details of access elsewhere**, with or without limitations, please do so. For example:

*Data cannot be shared publicly because*

Data cannot be shared publicly because of the confidentiality of the participants. Data will be available from the icddr,b Ethics Committee after formally applying to the corresponding author (gafrique@icddr.org).

of [XXX]. Data are available from the XXX Institutional Data Access / Ethics Committee (contact via XXX) for researchers who meet the criteria for access to confidential data.

The data underlying the results presented in the study are available from (include the name of the third party and contact information or URL).

- This text is appropriate if the data are owned by a third party and authors do not have permission to share the data.

\* typeset

Additional data availability information:

Tick here if the URLs/accession numbers/DOIs will be available only after acceptance of the manuscript for publication so that we can ensure their inclusion before publication.

1 **Cholera outbreak in Forcibly Displaced Myanmar National (FDMN) from a**  
2 **small population segment in Cox's Bazar, Bangladesh, 2019**

3

4 ASG Faruque<sup>1¶\*</sup>, Azharul Islam Khan<sup>1¶</sup>, Baitun Nahar<sup>1</sup>, SM Rafiqul Islam<sup>1</sup>, M Nasif Hossain<sup>1</sup>,  
5 Syed Asif Abdullah<sup>1</sup>, Soroar Hossain Khan<sup>1</sup>, Md. Sabbir Hossain<sup>2</sup>, Feroz Hayat Khan<sup>2</sup>, Mukesh  
6 Prajapati<sup>2</sup>, Yulia Widiati<sup>3</sup>, ASM Mainul Hasan<sup>3</sup>, Minjoon Kim<sup>4</sup>, Jennie Musto<sup>2</sup>, Maya  
7 Vandenant<sup>4</sup>, John David Clemens<sup>1,5</sup>, Tahmeed Ahmed<sup>1</sup>

8

9 <sup>1</sup>Nutrition and Clinical Services Division, icddr,b, Dhaka 1212, Bangladesh

10 <sup>2</sup>World Health Organization, Cox's Bazar, Bangladesh

11 <sup>3</sup>UNICEF Bangladesh, Cox's Bazar Field Office

12 <sup>4</sup>UNICEF Bangladesh Country Office

13 <sup>5</sup>UCLA Fielding School of Public Health, USA

14

15 ¶ These authors Contributed equally to this work as joint first authors

16

17 \*ASG Faruque

18 Email: gfaruque@icddr.org

19

20 **Abstract**

21 **Objective:** Bangladesh experienced a sudden, large influx of forcibly displaced persons from  
22 Myanmar in August 2017. A cholera outbreak occurred in the displaced population during  
23 September-December 2019. This study aims to describe the characteristics of cholera cases, their  
24 care-seeking pattern, camp-wise distribution of Forcibly Displaced Myanmar National (FDMN)  
25 cases, sources of drinking water, toilet use pattern, oral cholera vaccine (OCV) status, and share  
26 the experiences from effective interventions to prevent a cholera outbreak.

27 **Methods:** Diarrhea Treatment Center (DTC) based surveillance was carried out among the  
28 FDMN in Teknaf and Leda DTCs for cholera during September-December 2019.

29 **Results:** During the study period, 147 cases of cholera were hospitalized. The majority, 72% of  
30 cases reported to Leda DTC. Nearly 65% sought care from FDMN settlements. About 47% of  
31 the cholera cases were children less than 5 years old and 42% were aged 15 years and more. Half  
32 of the cholera cases were females. FDMN often reported from Camp # 26 (45%), followed by  
33 Camp # 24 (36%), and Camp # 27 (12%). Eighty-two percent of the cases reported watery  
34 diarrhea. Some or severe dehydration was observed in 65% of cholera cases. Eighty-one percent  
35 of cases received pre-packaged ORS at home. About 88% of FDMN cholera cases reported  
36 consumption of public tap water. Pit latrine without water seal was often used by FDMN cholera  
37 cases (78%).

38 **Conclusion:** Vigilance for cholera cases by routine surveillance, preparedness, and response  
39 readiness for surges and OCV campaigns can alleviate the threats of cholera.

40

41 **Keywords.** Cholera, under-five children, displaced population, emergency and crisis settings,  
42 case management

43 **Author Summary**

44 Bangladesh observed an unexpected, large-scale arrival of forcibly displaced individuals from  
45 Myanmar in August 2017. The Bangladesh Government, UN agencies, and international and  
46 national non-governmental organizations responded immediately with extensive humanitarian  
47 response. However, because of the exceptionally large size of the displaced population, and the  
48 presence of inadequate lifesaving infrastructures of sanitation, threats of acute watery diarrhea,  
49 cholera, and shigellosis outbreaks were prevailing. The Government of Bangladesh as lead, with  
50 technical support from icddr,<sup>b</sup> collaborating with international agencies undertook a massive oral  
51 cholera vaccination (OCV) campaign immediately as a pre-emptive measure to alleviate threats  
52 of cholera outbreak. Despite that mass OCV campaign, threats of cholera outbreak among  
53 Forcibly Displaced Myanmar Nationals were existing due to new arrivals of the displaced  
54 population with compromised host susceptibility, frequent visits to settlements by Bangladesh  
55 nationals without exposure to OCV and, the declining vaccine immunity among OCV recipients  
56 as well as an increasing number of cohort children without any exposure to OCV. The population  
57 faced a cholera outbreak during September-December 2019. This study aims to describe the  
58 characteristics of cholera cases from that outbreak, their care-seeking pattern, camp-wise  
59 distribution, source of drinking water, sanitation facility, OCV status, and share the experiences  
60 from effective interventions to prevent a cholera outbreak. Vigilance for cholera cases by routine  
61 surveillance, preparedness, and response readiness for surges and OCV campaigns can alleviate  
62 the threats of cholera.

63



## 64 **Introduction**

65 In August 2017, Bangladesh witnessed a sudden influx of an estimated 745,000 Forcibly  
66 Displaced Myanmar Nationals (FDMN) including more than 400,000 children within 17 weeks  
67 from neighboring Rakhine state in Myanmar who settled in the Cox's Bazar district situated in  
68 the south-east of the country. Their journey to Bangladesh was hazardous with limited access to  
69 food and water, often had diverse injuries and illnesses, crossed through jungles and  
70 mountainous terrain and finally, most of them had a boat ride to cross the Naf river while some  
71 confronted risky sea voyage across the Bay of Bengal. The Bangladesh Government, UN  
72 agencies, and a large number of international and national non-governmental organizations  
73 (NGOs) reacted immediately with a large-scale humanitarian response. Camps were established  
74 quickly but soon humanitarian agencies started struggling to meet the exorbitant demand for  
75 assistance and supplies. The displaced population urgently needed critical supplies like medicine,  
76 clean water, food, and shelter with special attention to children, women, the elderly, and disabled  
77 individuals. Many of the hurriedly built camps were vulnerable to monsoon flooding and storm  
78 surges. Those families who started living in hillsides were prone to landslides. Latrines and  
79 shallow and deep tube wells were constructed to protect against public health issues and ensure  
80 access to clean water. However, because of the arrival of a large number of displaced  
81 populations and the presence of insufficient lifesaving infrastructures of sanitation, like latrines  
82 and water points, the environment soon became a breeding ground for waterborne diseases  
83 including acute watery diarrhea, cholera, and shigellosis. These risks were further heightened by  
84 high population density in camps and an excess number of severely malnourished children who  
85 yield even more quickly to preventable and treatable diseases as well as outbreaks of acute  
86 watery diarrhea (AWD), cholera, and shigellosis [1–7].

87 Almost immediately, following the huge influx and settlement of these displaced populations,  
88 UNICEF-Bangladesh and icddr,b jointly conducted a brief field assessment in Ukhia and Teknaf  
89 sub-districts of Cox's Bazar. The assessment anticipated potential threats of diarrheal disease  
90 outbreaks including cholera and shigellosis, and strategies were immediately set to initiate  
91 mitigation measures. A partnership between icddr,b, and UNICEF under the umbrella of Health  
92 Sector targeted (i) training doctors, nurses, and community health workers of the government  
93 and NGO run facilities serving FDMN in the settlements as well as host population living in the  
94 neighborhood housing; (ii) managing cases of dehydrating diarrheal episodes and associated  
95 malnutrition through a network of five diarrhea treatment centers (DTCs); and carrying out DTC  
96 based diarrheal disease surveillance as it is known to be critical for early detection of outbreaks.  
97 Activities of the diarrheal disease surveillance team included data collection, a one-step rapid  
98 diagnostic test for the presence of *Vibrio cholerae* in stool specimen of hospitalized patients, and  
99 microbial tests to detect common enteric pathogens including *Vibrio cholerae* by submitting  
100 fecal specimens directly as well as after inoculation into Cary-Blair Transport Medium to the  
101 Clinical Microbiology Laboratory of icddr,b in Dhaka, Bangladesh.

102

103 The Government of Bangladesh as lead, with technical support from icddr,b collaborating with  
104 international agencies, and international and national NGOs under the wider platform of Health  
105 Sector, undertook a massive oral cholera vaccination (OCV) campaign immediately as a pre-  
106 emptive measure to alleviate threats of cholera outbreaks [8–10]. Despite that mass oral cholera  
107 vaccination campaign, threats of cholera outbreaks among FDMN were existing due to new  
108 arrivals of the displaced population with compromised host susceptibility, frequent visits to  
109 settlements by Bangladesh nationals living in the neighboring community without exposure to

110 OCV and, the decay of vaccine immunity in ong OCV recipients as well as an increasing  
111 number of cohort children without any exposure to OCV. Preparedness for combating surges  
112 and vigilance for cholera cases were the most important public health priorities because of  
113 prevailing threats of cholera in both the host and displaced population [11,12].

114  
115 icddr,b, and UNICEF jointly organized a dissemination session for the local stakeholders on their  
116 activities for the FDMN living in the settlements in March 2019. Between September and  
117 December 2019, there have been 147 cases of culture-confirmed cholera who presented and  
118 subsequently hospitalized with acute dehydrating diarrhea episodes in Leda and Teknaf DTCs.  
119 Thus, it became essential to share this cholera outbreak control experience with policymakers,  
120 public health teams, program managers, academia, and wider stakeholders acquired from a  
121 perspective of sufficiently prepared, field-based, and well-tailored strategy in an emergency and  
122 crisis setting. Such experience sharing is not a common and widespread phenomenon,  
123 particularly in humanitarian emergencies. An update of this kind is likely to enable stakeholders  
124 to undertake necessary preparedness to prevent cholera outbreaks from occurring and to respond  
125 successfully when the outbreaks have occurred.

126  
127 This paper aims to (i) describe the characteristics of cholera cases including that of FDMN care  
128 seekers, their reporting pattern to DTCs, camp-wise distribution, and OCV status, (ii) compare  
129 drinking water sources and toilet use pattern between FDMN and host community cholera cases,  
130 (iii) describe comparative clinical and demographic characteristics between cholera cases who  
131 sought care from Cox's Bazar DTCs, and Dhaka Hospital of icddr,b during the same period, and  
132 (iv) share the experiences that were obtained from this cholera outbreak that occurred in a small

133 segment of the FDMN living in settlements of Cox's Bazar, Bangladesh.

134

## 135 **Methods**

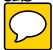

### 136 **Setting and study population**

137 This was a DTC based cross-sectional diarrheal disease surveillance for FDMN and host  
138 community individuals hospitalized in DTCs.

139 In e September 2019, two cholera cases for the first time after two years of the arrival of  
140 FDMN were detected in Teknaf DTC which is run by icddr,b. They sought care from settlements  
141 (one from Camp # 25 and the other from Camp # 26). Such an incident was reported  
142 immediately to the Epidemiology Team Lead and Early Warning, Alert and Response System  
143 (EWARS) of WHO-Cox's Bazar, as well as UNICEF-Cox's Bazar. The next day, Cox's Bazar  
144 Health Sector's Joint Assessment Team (JAT) consisting of Health and WASH Sector partners  
145 investigated the hotspots and affected camps. The JAT reported worsening hygiene practices and  
146 sanitary conditions as a result of an acute shortage of safe drinking water, and the use of stagnant  
147 contaminated water for domestic purposes. Several recommendations were made on that day  
148 including hygiene promotion in the hot spots, desludging of latrines as soon as possible,  
149 distribution of water purifying tablets, pre-packaged ORS, soap, and chlorine by the WASH  
150 Sector, and availability of a handwashing facility in the latrine areas. The stagnant contaminated  
151 pools of water were fenced to prevent access to it by people living in its surroundings. Urgent  
152 refresher training on risk assessment for health teams was recommended. Within 24 hours, one  
153 temporarily closed down DTC in Leda close by the affected settlements was reopened to serve  
154 the increasing number of AWD cases.

155

156 The Health Systems of Bangladesh Government joined WHO-Cox's Bazar in streamlining  
157 activities of EWARS. Such an exertion strengthened monitoring of the cases of AWD and  
158 cholera in the camps for early detection and response to outbreaks. Moreover, a meeting of the  
159 Directorate General of Health Services and leading international agencies responsible for  
160 emergency responses in Cox's Bazar was followed by the institution of immediate alleviation  
161 measures that included the supply of safe drinking water and improvement of the sanitation  
162 system. To ensure adequate clinical management of AWD cases following a standard  
163 management protocol, the existing network of DTCs was strengthened by UNICEF-Cox's Bazar.  
164 WHO and the Health Sector recommended that those cases presenting to the out-patient clinics  
165 with dehydrating diarrhea should be immediately referred to Diarrhea Treatment Centres (DTC)   
166 run by icddr,b, or, if there were no DTCs nearby, to primary health care centers (PHCs) with  
167 isolation facilities. Leda DTC (14 beds) and Teknaf DTC (30 beds) located in the neighborhood  
168 of settlements remained open as usual round-the-clock. Six batches of the health workforce were  
169 immediately trained by icddr,b on the clinical management of AWD cases. Community health  
170 workers were also assigned by UNICEF-Cox's Bazar in outreach activities including promotion  
171 of good hygiene practices and combatting diarrhea episodes at the household level with the use  
172 of pre-packaged ORS as soon as there is the onset of these episodes [13–16].

173  
174 Preparations and response readiness were undertaken for the acceleration of the existing cholera  
175 vaccination campaign as an increasing trend of dehydrating diarrhea cases in DTCs was  
176 revealed. As a result, the International Coordinating Group for Cholera Vaccine (ICG)  
177 Secretariat approved a request for additional 1.2 million doses of OCV. Ministry of Health and  
178 Family Welfare, Bangladesh playing the leading role with the support of WHO, UNICEF, and

179 other partners, the campaign started vaccinating those individuals living in the neighborhood  
180 host community but yet to receive any OCV. The OCV campaign (including operational cost)  
181 was funded by GAC , the Vaccine Alliance. The vaccination operation aimed mostly to reach  
182 displaced children aged 12-59 months. In the host community, the campaign looked for any  
183 person aged 1 year or more, because approximately 80% of host community people residing  
184 near the settlements were never targeted to receive OCV in previous campaigns although they  
185 were equally vulnerable like the FDMN [13,14].

186 

187 Routine enteric pathogen detection activities that included a collection of a single stool specimen  
188 (of at least 3 g) directly from the patients following hospitalization were ongoing. Soon after  
189 collection, a one-step rapid diagnostic test was performed by SD BIOLINE cholera antigen  
190 O1/O139 (44FK30) test kit, supplied by WHO-Cox's Bazar, which is an  
191 immunochromatographic test for the qualitative detection of *Vibrio cholerae* O1/O139 in human  
192 stool specimens (manufactured by STANDARD DIAGNOSTICS, INC located in Suwon city,  
193 Kyonggi province, Republic of Korea). To facilitate microbial culture to confirm the rapid  
194 diagnostic test results; the provisionally diagnosed specimens (the stool) of cholera cases were  
195 inoculated into Cary-Blair Transport Medium; and the medium was then sent as soon as possible  
196 to the Clinical Microbiology Laboratory, icddr,b, based in Dhaka, Bangladesh to isolate the  
197 colony as well as perform antibiotic susceptibility tests with immediate sharing of the results to  
198 the concerned DTC, Epidemiology Team Lead of WHO-Cox's Bazar and UNICEF-Cox's Bazar.  
199 Other non-positive by rapid diagnostic test specimens were submitted routinely once or twice a  
200 week [17–19].

201

202 In daily monitoring, evaluation, and reporting, icddr,b followed its expertise gathered from its  
203 hospital-based Diarrheal Disease Surveillance System (DDSS) which is in operation in icddr,b's  
204 urban Dhaka (since 1979), and rural Matlab (since 1999) facilities. The Diarrheal Disease  
205 Surveillance System (DISS) at Dhaka Hospital enrolls a 2% systematic sample of patients  
206 reporting to the triage area. Patients seeking care from the Matlab Hospital who are residents of  
207 the Demographic Surveillance System (DSS) area are enrolled into the DDSS. Trained  
208 enumerators using structured questionnaires interview patients and/or their attendants to collect  
209 relevant information on socioeconomic and demographic profile, housing and settings of the  
210 adjacent environment, feeding practices particularly of infants and toddlers, and use of drugs and  
211 fluid therapy at home before reporting to the facility. Additional information that is recorded  
212 includes clinical features, anthropometric measurements, treatments received in the facilities, and  
213 the outcome of the patients. Microbiological assessments are performed to identify common  
214 diarrheal pathogens and document the microbial susceptibility pattern of the bacterial pathogens.  
215 The activity offers useful information to hospital clinicians in their clinical decision-making  
216 courses and empowers icddr,b to detect the emergence of new enteric pathogens and early  
217 recognition of outbreaks and their locations, thereby guiding the host government to take suitable  
218 preventive and control measures [17–19]. Ongoing data collection by trained research assistants  
219 entailed administering structured questionnaires, from all hospitalized patients in DTCs and/or  
220 their attendants to gather information such as presenting clinical features, socioeconomic and  
221 demographic contexts, water, sanitation and hygiene, housing and its surrounding environment,  
222 feeding practices, particularly of 0-35 months old, and use of drugs and pre-packaged ORS at  
223 home before coming to DTC continued round-the-clock.

224

## 225 **Ethics statement**

226 The data collection process of this study was part of the ongoing activities entitled: *Surveillance*  
227 *for etiologic agents, care-seeking behavior, the status of IYCF and WASH practices among*  
228 *patients or their caregivers from Rohingya refugees as well as host population in Cox's Bazar*  
229 *district attending icddr,b operated Diarrhea Treatment Centers* was approved by icddr,b's  
230 (International Centre for Diarrhoeal Disease Research, Bangladesh) IRB comprising Research  
231 Review Committee (RRC) and Ethical Review Committee (ERC). Voluntary written informed  
232 consent was obtained from the parent/guardian before starting the interviewing process.

233

## 234 **Statistical analysis**

235 Data were analyzed by STATA (StataCorp version 13) and analyses included descriptive  
236 methods. Variables were described using frequencies with percentages. Exposure categories  
237 were compared using Pearson  $\chi^2$  tests for categorical variables. Relevant data from the ongoing  
238 DDSS database of Dhaka Hospital were extracted for the period September-December, 2019 for  
239 a comparative analysis of clinical and demographic profiles of visiting culture-proven cholera  
240 cases between Cox's Bazar DTCs and Dhaka Hospital of icddr,b.

241

## 242 **Results**

243 Between September and December 2019, there were  cases of culture-confirmed cholera who  
244 presented and were subsequently hospitalized with acute dehydrating diarrhea episodes in Leda  
245 and Teknaf DTCs. The majority, 72% of cases reported to Leda DTC. Nearly 65% of these  
246 cholera cases sought care from FDMN settlements. FDMN often reported to DTCs from Camp   
247 26 (45%), followed by Camp # 24 (36%), and Camp # 27 (12%). About 94% of the cholera cases



248 from the host community and 65% of the cholera cases from FDMN living in settlements did not  
 249 receive any OCV before their onset of culture-proven cholera episodes (Table 1).

250 **Table 1** Distribution of characteristics of culture-confirmed cholera patients (n=147) in Leda and  
 251 Teknaf DTCs in Cox’s Bazar settlements, September-December 2019

| Variables name             | n (%)      |
|----------------------------|------------|
| <b>Sought care from</b>    |            |
| Leda DTC                   | 106 (72.1) |
| Teknaf                     | 41 (27.9)  |
| <b>Currently living in</b> |            |
| Settlements                | 95 (64.6)  |
| Host community             | 52 (35.4)  |
| <b>From settlements</b>    |            |
| Camp # 26                  | 43 (45.3)  |
| Camp # 24                  | 34 (35.8)  |
| Camp # 27                  | 11 (11.6)  |
| Camp # 25                  | 4 (4.2)    |
| Camp # 15                  | 2 (2.1)    |
| Camp # 23                  | 1 (1.1)    |
| <b>Not exposed to OCV</b>  |            |
| FDMN                       | 62 (65.3)  |
| Host community individuals | 49 (94.2)  |

252 DTC: Diarrhea treatment center; OCV: Oral cholera vaccine

253 The major sources of drinking water of the hospitalized displaced cholera cases were public tap  
 254 installed in the settlements, deep tube-well, and shallow tube well. Use of public tap water was  
 255 significantly more frequent in cholera cases from settlements than from the host community  
 256 (88% vs. 10%;  $p<0.001$ ). However, the use of deep tube well (6% vs. 21%;  $p=0.005$ ) and  
 257 shallow tube well (2% vs. 54%;  $p<0.001$ ) water was significantly less common in the cholera  
 258 cases from settlements. Nearly 78% of the displaced cholera cases used pit latrines without water  
 259 seal as opposed to 44% of the cholera patients from the host community ( $p<0.001$ ). However, the  
 260 use of a pit latrine with a water seal was identical in both the groups (Table 2).

261 **Table 2** Water source and toilet use by the culture-confirmed cholera patients in Leda and  
 262 Teknaf DTCs in Cox’s Bazar settlements, September-December 2019

| Variables                      | FDMN<br>n=95 (%) | Host community<br>n=52 (%) | P-value |
|--------------------------------|------------------|----------------------------|---------|
| <b>Water source</b>            |                  |                            |         |
| Public tap                     | 84 (88.4)        | 5 (9.6)                    | <0.001  |
| Deep tube well                 | 6 (6.3)          | 11 (21.2)                  |         |
| Shallow tube well              | 2 (2.1)          | 28 (53.8)                  |         |
| Others                         | 3 (3.2)          | 8 (15.4)                   |         |
| <b>Toilet use pattern</b>      |                  |                            |         |
| Pit latrine without water seal | 74 (77.9)        | 23 (44.2)                  | <0.001  |
| Pit latrine with water seal    | 21 (22.1)        | 12 (23.1)                  |         |
| Others                         | 0 (0.0)          | 17 (32.7)                  |         |

263

264 During September-December 2019, a total of 216 culture-confirmed cholera cases were

265 hospitalized in icddr,b's Dhaka Hospital, and none had received OCV. During the same period,

266 DTC logs reported the admission of 147 culture-proven cholera cases in Leda and Teknaf DTCs.

267 Among these cholera cases, infants ( $p<0.001$ ) and overall children  $<5$  years old ( $p<0.001$ )

268 presented more frequently to the DTCs (functioning to treat FDMN living in settlements as well

269 as host community individuals) compared to cholera children presenting to Dhaka Hospital from

270 Dhaka city and its suburbs (47% vs. 12%;  $p<0.001$ ). However, for individuals aged 15 years and

271 higher, more cholera patients reported to Dhaka Hospital as opposed to cholera cases living in

272 settlements and seeking care from DTCs (76% vs. 42%;  $p<0.001$ ) (Table 3). Significantly more

273 female cholera cases visited DTCs as opposed to female cholera patients presenting to Dhaka

274 Hospital (50% vs. 38%,  $p<0.043$ ). Cholera cases in Dhaka Hospital more commonly presented

275 with watery diarrhea than cholera patients of DTCs (100% vs. 82%,  $p<0.001$ ), sought care more

276 frequently with some or severe dehydration (98% vs. 65%,  $p<0.001$ ), and had more access to

277 ORS at home before seeking care (91% vs. 81%,  $p<0.010$ ) (Table 3).

278 **Table 3** Age stratified cholera cases in Dhaka Hospital and DTCs in Cox's Bazar settlements,

279 September-December 2019

| Variables | Dhaka hospital | DTCs in settlements | p-value |
|-----------|----------------|---------------------|---------|
|-----------|----------------|---------------------|---------|

|                                    | n=216 (%)           | n=147 (%)           |        |
|------------------------------------|---------------------|---------------------|--------|
| <b>Age (Year)</b>                  |                     |                     |        |
| <1                                 | 3 (1.4)             | 14 (9.5)            | <0.001 |
| <5                                 | 25 (11.6)           | 69 (46.9)           |        |
| 5-14                               | 28 (13.0)           | 17 (11.6)           |        |
| 15 and more                        | 163 (75.5)          | 61 (41.5)           |        |
| <b>Range</b>                       | 7 months – 74 years | 3 months – 85 years |        |
| <b>Female</b>                      | 83 (38.4)           | 73 (49.7)           | 0.043  |
| <b>Duration of diarrhea</b>        |                     |                     |        |
| <1 day                             | 153 (70.8)          | 100 (68.0)          | 0.300  |
| 1-3 days                           | 57 (26.4)           | 38 (25.9)           |        |
| 4 days and more                    | 6 (2.8)             | 9 (6.1)             |        |
| <b>Watery stool</b>                | 216 (100.0)         | 120 (81.6)          | <0.001 |
| <b>Some or severe dehydration</b>  | 211 (97.7)          | 95 (64.6)           | <0.001 |
| <b>Pre-packaged ORS us at home</b> | 196 (90.7)          | 119 (81.0)          | 0.010  |

280 DTC: Diarrhea treatment center; ORS: Oral rehydration solution

## 281 Discussion

282 Humanitarian emergencies increase the risk of infectious disease transmission including cholera  
283 and shigellosis, and the prevalence of other health conditions such as severe undernutrition. An  
284 effective disease surveillance system is critical for early detection of disease outbreaks before  
285 any spread to other family members as well as individuals living in the neighborhood,  
286 unnecessarily costing lives and challenging the disease control efforts. Thus, our ongoing DTC  
287 based diarrheal disease surveillance system with timely laboratory back-up and immediate  
288 reporting was noteworthy in this emergency and crisis setting. The surveillance system was  
289 involved not only in collecting reliable data since the inception of the DTC network but also in  
290 reporting immediately to help significantly in anticipating and detecting early potential cholera  
291 outbreaks. Findings from surveillance system guided intervention strategies that lead to the  
292 timely undertaking of preventive measures and preparedness including training of health care  
293 staff and prepositioning of supplies and additional human resources. Additionally, surveillance  
294 data helped in identifying vulnerable populations living in high-risk areas who might have been  
295 benefitted from preventive OCV use. Thus, reliable epidemiological data was critical in the

296 efficient implementation of preventive as well as control measures. The present study observed  
297 that 94% of the host community individuals and two-third of the FDMN with laboratory-  
298 confirmed cholera were not exposed to OCV before getting hospitalized with AWD.

299  
300 A recent experience from Bangladesh and India indicated that the protective efficacy of  
301 Shanchol OCV (produced in India) among those more than five years against cholera is 53-65%.  
302 The study mentioned the positive role of OCV as a pre-emptive measure in endemic settings, in  
303 natural or man-made disasters even in disruptive situations with a breakdown of WASH and  
304 absence of other disease control and public health measures [20]. WHO and Global Task Force  
305 for Cholera Control (GTFCC) recommend that a comprehensive multi-sectoral involvement is  
306 important for the successful elimination of cholera [21]. Mass OCV campaigns with high  
307 coverage are feasible even after the arrival of a large number of displaced populations in a  
308 distressed state in resource poor-settings like Bangladesh [8,9]. According to another study,  
309 OCV induced optimal immune responses in FDMN adults and children which were similar to  
310 that observed in Bangladesh's population of diverse age groups or individuals living in other  
311 cholera endemic countries [10].

312  
313 In this study, we have explored the clinical, demographic, and hygienic practices of the displaced  
314 as well as the host population living in settlements and neighboring host communities. The  
315 findings of this study have public health implications and may be useful for the Health System of  
316 Government of Bangladesh for anticipation, preparedness, and implementation of preventive and  
317 mitigation measures in settings with public health threats such as endemic disease surges like  
318 cholera or it is breaking out into epidemic proportions. Additionally, vigilance for cause-specific

319 diarrhea surges in both the populations such as host and FDMN is critical. Several findings  
320 related to care-seeking from DTCs were noteworthy. Unlike Dhaka hospital, children living in  
321 settlements and host communities were more often hospitalized for culture-proven cholera  
322 episodes than their peers from Dhaka city and its suburbs. These observations underscore the  
323 need for OCV campaigns. Females aged 15 years and higher living in settlements were more  
324 often hospitalized with cholera than their peers seeking care from Dhaka Hospital. This may be  
325 due to the increased vulnerability of females living in settlements to cholera because of their  
326 higher compromised immunity or excess exposure to contaminated water and food during  
327 household activities. Excess reporting of male cholera cases in Dhaka Hospital may be due to  
328 increased mobility of male individuals as well as their frequent exposures to day-time unhygienic  
329 out-door street-side meals or snacks from vendors in the overcrowded megacity.

330

331 ORS use at home was significantly lower in the cholera cases seeking care from DTCs than those  
332 cholera cases living in Dhaka city and its suburbs. Likely explanations include less access to  
333 ORS packets at the household or community level because of less organized outreach activities  
334 to promote ORS at the household level in settlements. Alternatively, the displaced population  
335 was not optimally motivated to start ORS before coming to DTCs. Access to more safe water  
336 (chlorinated water supplied through taps installed) was observed in settlements mostly for  
337 FDMN as provided by international agencies and NGOs. However, their access to deep and  
338 shallow tube well water was less commonly observed compared to that of admissions from the  
339 host community. Cholera cases with significantly more frequent watery stool and with more  
340 frequent evidence of some or severe dehydration in Dhaka hospital could be due to more full-  
341 blown clinical features of cholera episodes which may be because of larger inoculum size that

342 may be ingested by those living in the more contaminated environment particularly in slums with  
343 gross lack of water and sanitation services as well as worsening hygienic practices in Dhaka city  
344 and its suburbs.

345  
346 In Sudan among the displaced populations, the risks for cholera were considerably higher among  
347 children less than five years living in refugee camps [22].  A Cochrane review indicated  
348 significantly lower protective efficiency of OCV in under-five children compared to children  
349 who are older than them as well as adults [23]. Vigilance for cholera cases as well as  
350 preparedness for prevention and mitigation measures for surges and mass OCV campaigns for  
351 FDMN as well as host population can reduce the threats of cholera in both the host and FDMN  
352 [24–29].

353  
354 One of the limitations of the study was that these activities were DTC based as a result only  
355 those cholera cases with admissions in DTCs have been included in the study. Cholera patients  
356 with less severe disease who reported to the DTCs and received care on an out-patient basis for a  
357 brief period and those cases that occurred at the community and did not report to DTCs have not  
358 been studied. Thus, results may not be generalizable. However, the study of a fairly large number  
359 of cholera cases captured during an outbreak as well as quality laboratory performance were the  
360 strengths of the study.

361

## 362 **Conclusion**

363 Threats of cholera outbreaks among the FDMN are continuing due to new arrivals with  
364 compromised host susceptibility, the declining immunity to the vaccine among OCV recipients

365 as well as an increasing number of cohort children without any exposure to OCV. Quality  
366 surveillance and rapid microbial confirmation of provisionally diagnosed suspected cases have  
367 important public health implications in emergencies and crises. Preparedness for surges and  
368 vigilance for cholera cases should be the priority undertakings of the Health Systems of  
369 Government of Bangladesh because of existing threats of cholera in both the host and displaced  
370 populations.

371

## 372 **Acknowledgments**

373 We acknowledge the contribution of icddr,b's core donors including the Government of the  
374 People's Republic of Bangladesh, Global Affairs Canada, Canada; Swedish International  
375 Development Cooperation Agency, and UK Aid (FCDO) for their continuous support and  
376 commitment to the icddr,b's research efforts.

377

## 378 **Funding**

379 This study was financially supported by UNICEF Bangladesh (donors for AWD Preparedness  
380 and Response activities include; USA (State) Bureau of Population, Refugees, and Migration  
381 (PRM), Government of Japan, Department for International Development (DFID) (now Foreign,  
382 Commonwealth & Development Office (FCDO), and Central Emergency Relief Fund for United  
383 Nations (CERF). The funding body had no role in the design of the study, data collection,  
384 analysis, and interpretation of the findings.

385

## 386 **Declarations of Interest**

387 None to declare.

### 388 **Availability of data and material**

389 This dataset and materials are available via the corresponding author and can be accessed on a  
390 valid request.

### 391 **Author Contributions**

392 Conceptualization: ASG Faruque, Tahmeed Ahmed, Azharul Islam Khan

393 Data curation: ASG Faruque, M Nasif Hossain, Soroar Hossain Khan

394 Formal analysis: Soroar Hossain Khan, M Nasif Hossain

395 Investigation: Tahmeed Ahmed, Azharul Islam Khan, ASG Faruque

396 Methodology: ASG Faruque, Azharul Islam Khan, SM Rafiqul Islam, Baitun Nahar, M Nasif

397 Hossain, Soroar Hossain Khan

398 Project administration: SM Rafiqul Islam, Syed Asif Abdullah, Baitun Nahar, M Nasif Hossain,

399 Soroar Hossain Khan

400 Supervision: M Nasif Hossain

401 Writing – original draft: ASG Faruque, Azharul Islam Khan, SM Rafiqul Islam, Baitun Nahar, M

402 Nasif Hossain, Syed Asif Abdullah, Mukesh Prajapati, Minjoon Kim, Jennie Musto

403 Writing – review & editing: Jennie Musto, Mukesh Prajapati, Yulia Widiati, ASM Mainul

404 Hasan, Feroz Hayat Khan, Md. Sabbir Hossain, Tahmeed Ahmed, Maya Vandenant, John David

405 Clemens, ASG Faruque, Baitun Nahar, Azharul Islam Khan, SM Rafiqul Islam, M Nasif

406 Hossain, Syed Asif Abdullah



407 References: M Nasif Hossain, Soroar Hossain Khan, ASG Faruque

408

## 409 **References**

- 410 1. Mark Bowden JC. Humanitarian Exchange Special feature Rohingya refugees in  
411 Bangladesh: the humanitarian response. 2017. Available: <http://www.odihpn.org>
- 412 2. Hassan M, Smith A, Walker K, Rahman M, Southworth J. Rohingya Refugee Crisis and  
413 Forest Cover Change in Teknaf, Bangladesh. *Remote Sens.* 2018;10: 689.  
414 doi:10.3390/rs10050689
- 415 3. Karo B, Haskew C, Khan AS, Polonsky JA, Mazhar MKA, Buddha N. World health  
416 organization early warning, alert and response system in the Rohingya crisis, Bangladesh,  
417 2017–2018. *Emerg Infect Dis.* 2018;24: 2074–2076. doi:10.3201/eid2411.181237
- 418 4. Islam MM, Nuzhath T. Health risks of Rohingya refugee population in Bangladesh: A call  
419 for global attention. *J Glob Health.* 2018;8. doi:10.7189/jogh.08.020309
- 420 5. Kennedy J, McCoy D. WHO and the health crisis among the Rohingya people of  
421 Myanmar. *Lancet.* 2017;389: 802–803. doi:10.1016/S0140-6736(16)00646-2
- 422 6. Pocock NS. Imminent health crises among the Rohingya people of Myanmar The  
423 international community must act to stop “slow burning genocide.” *BMJ.* 2017;359: 5210.  
424 doi:10.1136/bmj.j5210
- 425 7. Villasana D. Picturing health: Rohingya refugees in Bangladesh. *The Lancet.* Lancet  
426 Publishing Group; 2017. pp. 2233–2242. doi:10.1016/S0140-6736(17)32862-3
- 427 8. Qadri F, Azad AK, Flora MS, Khan AI, Islam MT, Nair GB, et al. Emergency deployment  
428 of oral cholera vaccine for the Rohingya in Bangladesh. *The Lancet.* Lancet Publishing  
429 Group; 2018. pp. 1877–1879. doi:10.1016/S0140-6736(18)30993-0
- 430 9. Khan AI, Islam MT, Siddique SA, Ahmed S, Sheikh N, Siddik AU, et al. Post-vaccination  
431 campaign coverage evaluation of oral cholera vaccine, oral polio vaccine and measles–  
432 rubella vaccine among Forcibly Displaced Myanmar Nationals in Bangladesh. *Hum*  
433 *Vaccines Immunother.* 2019;15: 2882–2886. doi:10.1080/21645515.2019.1616502
- 434 10. Chowdhury F, Bhuiyan TR, Akter A, Bhuiyan MS, Khan AI, Hossain M, et al.  
435 Immunogenicity of a killed bivalent whole cell oral cholera vaccine in forcibly displaced

- 436 Myanmar nationals in Cox's bazar, Bangladesh. *PLoS Negl Trop Dis.* 2020;14.  
437 doi:10.1371/journal.pntd.0007989
- 438 11. Shannon K, Hast M, Azman AS, Legros D, McKay H, Lessler J. Cholera prevention and  
439 control in refugee settings: Successes and continued challenges. *PLoS Negl Trop Dis.*  
440 2019;13. doi:10.1371/journal.pntd.0007347
- 441 12. Toole MJ, Waldman RJ. The public health aspects of complex emergencies and refugee  
442 situations. *Annual Review of Public Health.* Annual Reviews Inc.; 1997. pp. 283–312.  
443 doi:10.1146/annurev.publhealth.18.1.283
- 444 13. WHO. Enhancing public health through mass vaccination in Cox's Bazar: two weeks of  
445 oral cholera vaccination campaign. 2019 [cited 8 Aug 2020]. Available:  
446 [https://www.who.int/bangladesh/news/detail/22-12-2019-enhancing-public-health-](https://www.who.int/bangladesh/news/detail/22-12-2019-enhancing-public-health-through-mass-vaccination-in-cox-s-bazar-one-week-of-oral-cholera-vaccination-campaign)  
447 [through-mass-vaccination-in-cox-s-bazar-one-week-of-oral-cholera-vaccination-campaign](https://www.who.int/bangladesh/news/detail/22-12-2019-enhancing-public-health-through-mass-vaccination-in-cox-s-bazar-one-week-of-oral-cholera-vaccination-campaign)
- 448 14. WHO. Cholera vaccination campaign launched to protect 635,000 people in Cox's Bazar.  
449 2019 [cited 8 Aug 2020]. Available: [https://www.who.int/bangladesh/news/detail/09-12-](https://www.who.int/bangladesh/news/detail/09-12-2019-cholera-vaccination-campaign-launched-to-protect-635-000-people-in-cox-s-bazar)  
450 [2019-cholera-vaccination-campaign-launched-to-protect-635-000-people-in-cox-s-bazar](https://www.who.int/bangladesh/news/detail/09-12-2019-cholera-vaccination-campaign-launched-to-protect-635-000-people-in-cox-s-bazar)
- 451 15. Milton AH, Rahman M, Hussain S, Jindal C, Choudhury S, Akter S, et al. Trapped in  
452 statelessness: Rohingya refugees in Bangladesh. *International Journal of Environmental*  
453 *Research and Public Health.* MDPI AG; 2017. doi:10.3390/ijerph14080942
- 454 16. Mukul SA, Huq S, Herbohn J, Nishat A, Rahman AA, Amin R, et al. Rohingya refugees  
455 and the environment. Sills J, editor. *Science* (80- ). 2019;364: 138–138.  
456 doi:10.1126/science.aaw9474
- 457 17. Stoll BJ, Glass RI, Huq I, Khan MU, Holt JE, Banu H. Surveillance of patients attending a  
458 diarrhoeal disease hospital in Bangladesh. *Br Med J.* 1982.
- 459 18. Das SK, Ahmed S, Ferdous F, Farzana FD, Chisti MJ, Latham JR, et al. Etiological  
460 diversity of diarrhoeal disease in Bangladesh. *J Infect Dev Ctries.* 2013;7: 900–909.  
461 doi:10.3855/jidc.3003
- 462 19. Parvin I, Shahunja KM, Khan SH, Alam T, Shahrin L, Ackhter MM, et al. Changing  
463 Susceptibility Pattern of *Vibrio cholerae* O1 Isolates to Commonly Used Antibiotics in the  
464 Largest Diarrheal Disease Hospital in Bangladesh during 2000–2018. *Am J Trop Med*  
465 *Hyg.* 2020;103. doi:10.4269/ajtmh.20-0058
- 466 20. Islam MT, Chowdhury F, Qadri F, Sur D, Ganguly NK. Trials of the killed oral cholera

467 vaccine (Shanchol) in India and Bangladesh: Lessons learned and way forward. *Vaccine*.  
468 Elsevier Ltd; 2020. pp. A127–A131. doi:10.1016/j.vaccine.2019.06.082

469 21. WHO. ENDING CHOLERA A G L O B A L R O A D M A P T O 2 0 3 0 OVERVIEW  
470 OF. 2017.

471 22. Azman AS, Rumunu J, Abubakar A, West H, Ciglenecki I, Helderman T, et al.  
472 Population-level effect of cholera vaccine on displaced populations, South Sudan, 2014.  
473 *Emerg Infect Dis*. 2016;22: 1067–1070. doi:10.3201/eid2206.151592

474 23. Sinclair D, Abba K, Zaman K, Qadri F, Graves PM. Oral vaccines for preventing cholera.  
475 *Cochrane Database Syst Rev*. 2011;2011. doi:10.1002/14651858.cd008603.pub2

476 24. Colombara D V., Faruque ASG, Cowgill KD, Mayer JD. Risk factors for diarrhea  
477 hospitalization in Bangladesh, 2000-2008: A case-case study of cholera and shigellosis.  
478 *BMC Infect Dis*. 2014;14. doi:10.1186/1471-2334-14-440

479 25. Leung DT, Chowdhury F, Calderwood SB, Qadri F, Ryan ET. Immune responses to  
480 cholera in children. *Expert Review of Anti-Infective Therapy*. NIH Public Access; 2012.  
481 pp. 435–444. doi:10.1586/eri.12.23

482 26. Connolly MA, Gayer M, Ryan MJ, Salama P, Spiegel P, Heymann DL. Communicable  
483 diseases in complex emergencies: Impact and challenges. *Lancet*. *Lancet*; 2004. pp. 1974–  
484 1983. doi:10.1016/S0140-6736(04)17481-3

485 27. Qadri F, Bhuiyan TR, Sack DA, Svennerholm AM. Immune responses and protection in  
486 children in developing countries induced by oral vaccines. *Vaccine*. Elsevier; 2013. pp.  
487 452–460. doi:10.1016/j.vaccine.2012.11.012

488 28. Desai SN, Akalu Z, Teferi M, Manna B, Teshome S, Park JY, et al. Comparison of  
489 immune responses to a killed bivalent whole cell oral cholera vaccine between endemic  
490 and less endemic settings. *Trop Med Int Heal*. 2016;21: 194–201. doi:10.1111/tmi.12641

491 29. Levine MM. Immunogenicity and efficacy of oral vaccines in developing countries:  
492 Lessons from a live cholera vaccine. *BMC Biol*. 2010;8. doi:10.1186/1741-7007-8-129

493
